# Supplementary material for: Silk nanofiber hydrogels with tunable modulus to regulate nerve stem cell fate
Source: Royal Society of Chemistry journal article supplement (doi:10.1039/c4tb00878b), 2014-01-01
Supplement: c4tb00878b1.pdf [file c4tb00878b1.pdf]

## Supplementary information

### Silk Nanofiber Hydrogels with Tunable Modulus to Regulate Nerve Stem Cell Fate

ShuMeng Bai<sup>a</sup>, WenMin Zhang<sup>b,#</sup>, Qiang Lu<sup>a,c,\*</sup>, QuanHong Ma<sup>b,\*</sup>, David L. Kaplan<sup>a,d</sup>, HeSun Zhu<sup>e</sup>

<sup>a</sup>National Engineering Laboratory for Modern Silk & Collaborative Innovation Center of Suzhou Nano Science and Technology, Soochow University, Suzhou 215123, People's Republic of China

<sup>b</sup>Jiangsu Key Laboratory of Translational Research and Therapy for Neuro-Psycho-Diseases, Institute of Neuroscience, the Second Affiliated Hospital, Soochow University, Suzhou 215123, People's Republic of China

<sup>c</sup>Jiangsu Province Key Laboratory of Stem Cell Research, Medical College, Soochow University, Suzhou 215006, People's Republic of China

<sup>d</sup>Department of Biomedical Engineering, Tufts University, Medford, MA 02155, USA

<sup>e</sup>Research Center of Materials Science, Beijing Institute of Technology, Beijing, 100081, People's Republic of China

Corresponding author:

\*Qiang Lu, Tel: (+86)-512-67061649; E-mail: [Lvqiang78@suda.edu.cn](mailto:Lvqiang78@suda.edu.cn)

Co-Corresponding author:

\*QuanHong Ma, Tel: (+86)-512-65880829; E-mail: [h999.judy@gmail.com](mailto:h999.judy@gmail.com)

# The author contributed equally with the first author.

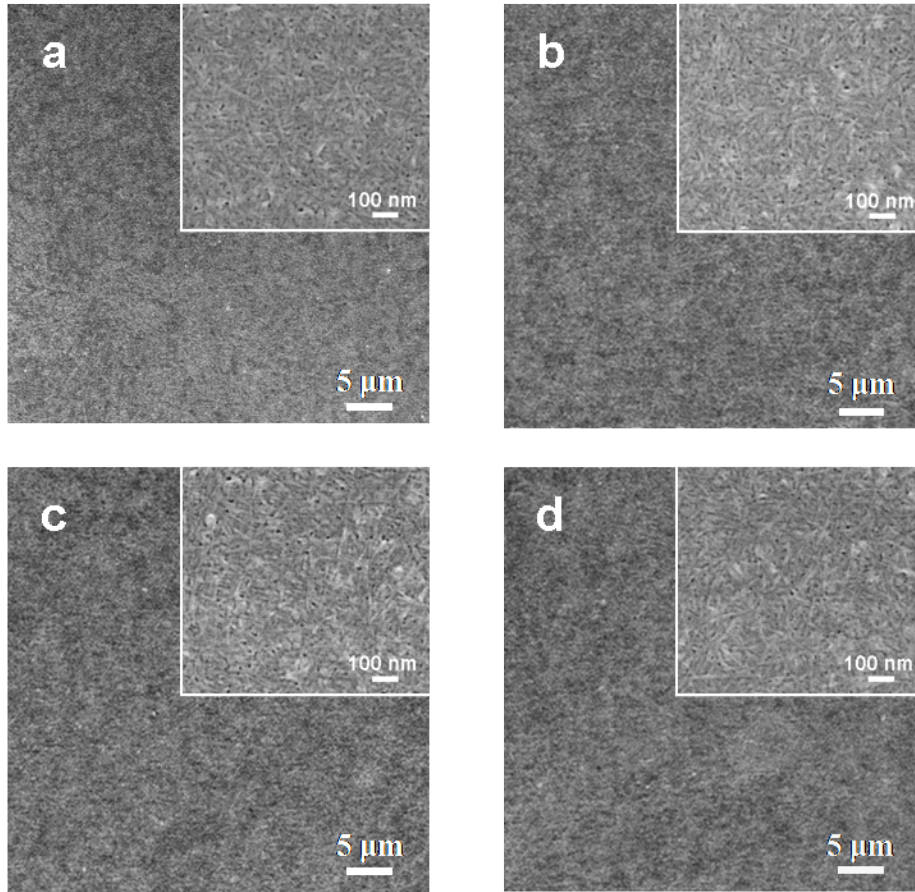

**Fig. S1** SEM images of silk nanofiber films from hydrogels with different treatments. (a) silk nanofiber hydrogel, SN-H; (b) water-annealed silk nanofiber hydrogel, WA-SN-H; (c) 50% methanol-annealed silk nanofiber hydrogel, MA50-SN-H; (d) 80% methanol-annealed silk nanofiber hydrogel, MA80-SN-H.

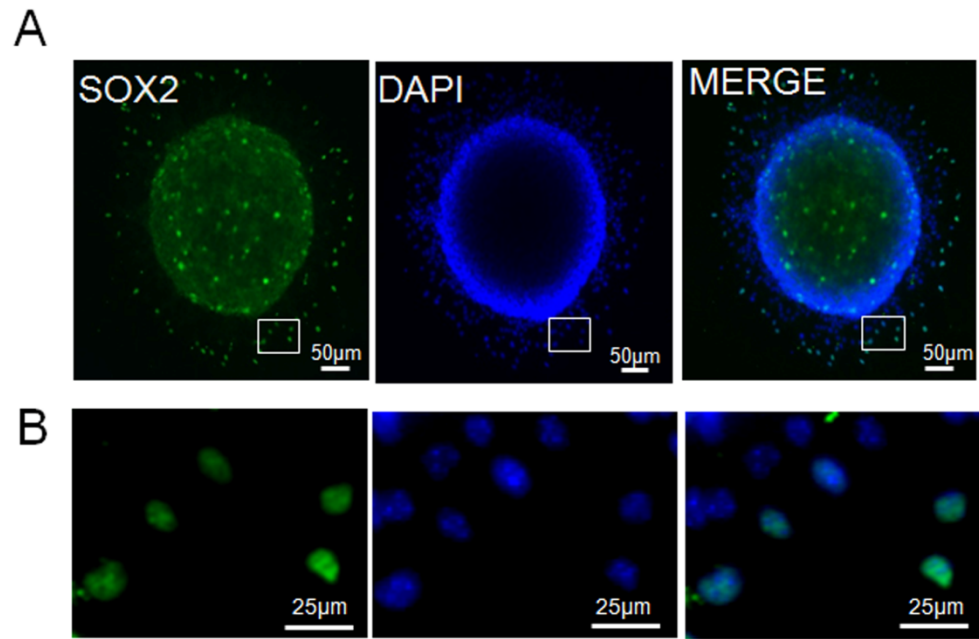

**Fig. S2** Neurospheres cultured for 24 h under differentiation conditions were stained for SOX2 and DAPI (A). Scale bars: 50  $\mu\text{m}$ .

Images with higher magnification shown in (B). Scale bars: 25  $\mu\text{m}$ .

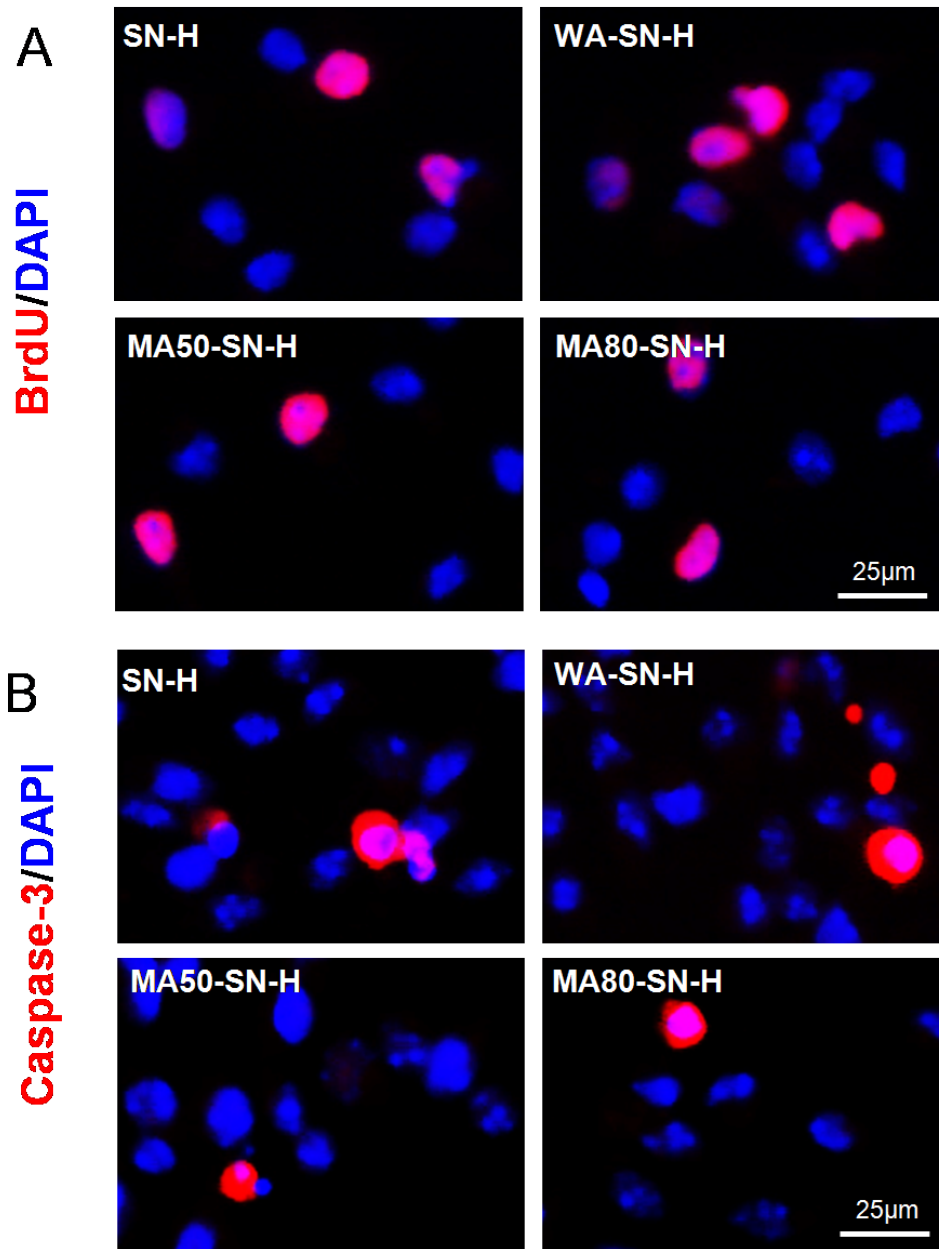

**Fig. S3** The high magnification images of the proliferation and apoptosis of NSCs on silk nanofiber hydrogels (SN-H) with different mechanical properties. NSCs on silk nanofiber hydrogels with different mechanical properties were incorporated BrdU for 4 h and stained for BrdU and DAPI (A). NSCs on silk nanofiber hydrogels with different mechanical properties stained for active Caspase3 and DAPI (B).

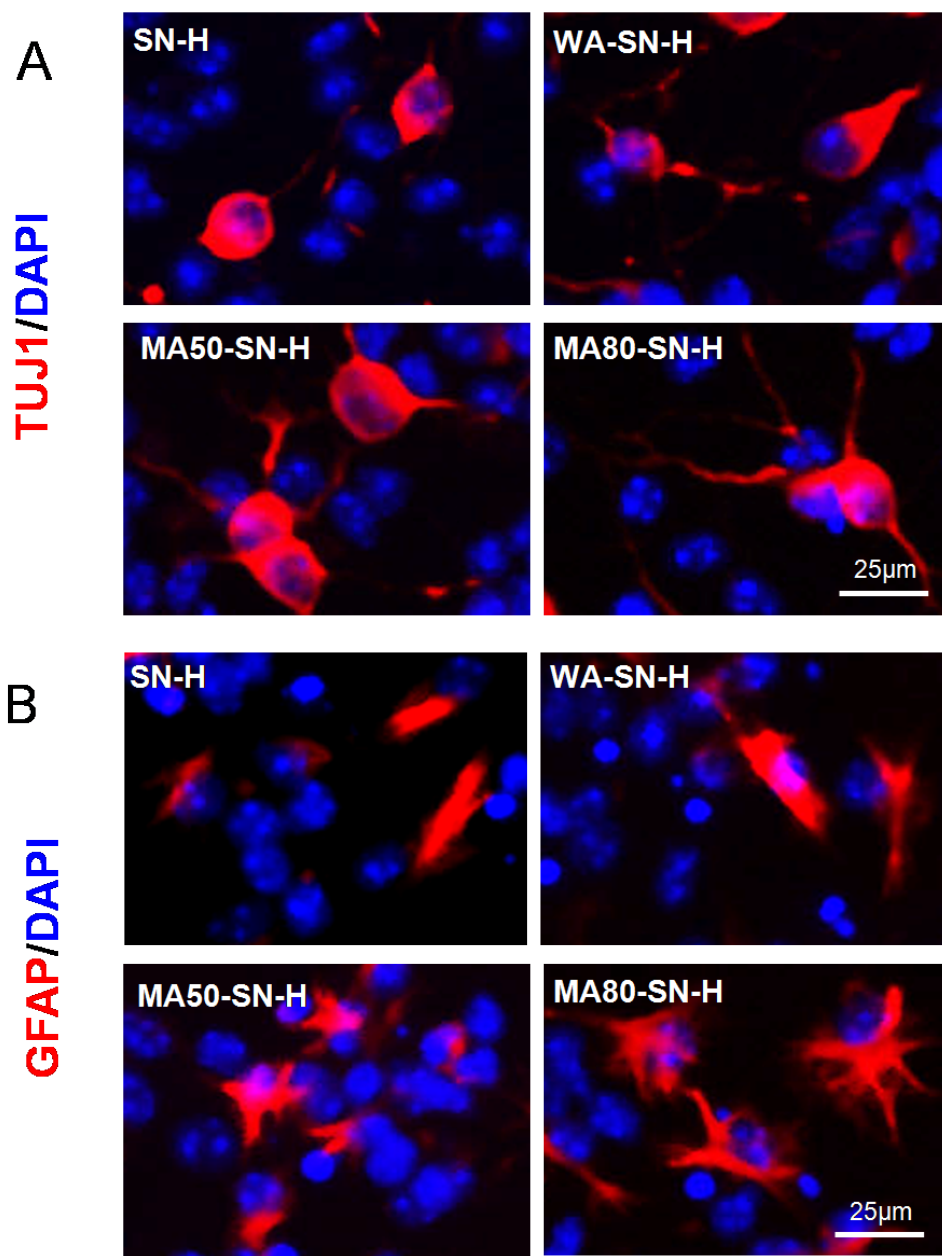

**Fig. S4** The high magnification images of the differentiation of NSCs on silk nanofiber hydrogels (SN-H) with different mechanical properties. NSCs seeded on silk nanofiber hydrogels with different mechanical properties were cultured for 3~5 days *in vitro*. The cells were stained for TUJ1 (A) or GFAP (B) and DAPI.
